# Supplementary material for: Musashi proteins are post-transcriptional regulators of the epithelial-luminal cell state
Source: eLife. 2014 Nov 7;3:e03915. doi: 10.7554/eLife.03915 (PMC4381951; doi:10.7554/eLife.03915)
Supplement: Supplementary file 1. — Breast cancer RNA-Seq datasets used in analysis (apart from TCGA). DOI: http://dx.doi.org/10.7554/eLife.03915.023 [file elife03915s001.xls]

## Sheet: SuppTable1.txt
#Breast cancer RNA-Seq datasets used in paper (apart from TCGA)
sample_name	source	sra_accession	reference
HMLE (Epithelial)	Gertler/Burge labs	n/a	Shapiro et. al., PLoS Genetics 2011
HMLE +Twist (Mesenchymal)	Gertler/Burge labs	n/a	Shapiro et. al., PLos Genetics 2011
MCF7 (1)	Burge lab	n/a	This study
MCF7 (2)	Burge lab	n/a	This study
BT20 (Thompson)	Thompson lab	SRR097786	Sun et. al., PLoS One 2011
BT474 (Thompson)	Thompson lab	SRR097787	Sun et. al., PLoS One 2011
MCF10A (Thompson)	Thompson lab	SRR097788	Sun et. al., PLoS One 2011
MCF7 (Thompson)	Thompson lab	SRR097789	Sun et. al., PLoS One 2011
MDAMB231 (Thompson)	Thompson lab	SRR097790	Sun et. al., PLoS One 2011
MDAMB468 (Thompson)	Thompson lab	SRR097791	Sun et. al., PLoS One 2011
T47D (Thompson)	Thompson lab	SRR097792	Sun et. al., PLoS One 2011
ZR751 (Thompson)	Thompson lab	SRR097793	Sun et. al., PLoS One 2011
MCF7 (Kallioniemi)	Kallioniemi lab	SRR064286	Edgren et. al., Genome Biology 2011
KPL4 (Kallioniemi)	Kallioniemi lab	SRR064287	Edgren et. al., Genome Biology 2011
Normal breast (Kallioniemi)	Kallioniemi lab	SRR064437	Edgren et. al., Genome Biology 2011
BT474 (Kallioniemi)	Kallioniemi lab	SRR064439	Edgren et. al., Genome Biology 2011
SKBR3 (Kallioniemi)	Kallioniemi lab	SRR064440	Edgren et. al., Genome Biology 2011
SKBR3_B, replicate (Kallioniemi)	Kallioniemi lab	SRR064441	Edgren et. al., Genome Biology 2011
SUM149PT (Foulkes)	Foulkes lab	SRR350978	Ha et. al. BMC Medical Genomics 2011
SUM1315O2 (Foulkes)	Foulkes lab	SRR353948	Ha et. al. BMC Medical Genomics 2011
HCC3153 (Foulkes)	Foulkes lab	SRR353604	Ha et. al. BMC Medical Genomics 2011
MCF10A (Foulkes)	Foulkes lab	SRR353603	Ha et. al. BMC Medical Genomics 2011
HCC1937 (Foulkes)	Foulkes lab	SRR350976	Ha et. al. BMC Medical Genomics 2011
